# Supplementary material for: Alteration of nanomechanical properties of pancreatic cancer cells through anticancer drug treatment revealed by atomic force microscopy
Source: publisher site journal article supplement (doi:10.3762/bjnano.12.101), 2021-12-14
Supplement: Additional file 1 [file 2190-4286-12-101-S1.pdf]

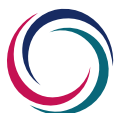

## Supporting Information

for

### **Alteration of nanomechanical properties of pancreatic cancer cells through anticancer drug treatment revealed by atomic force microscopy**

Xiaoteng Liang, Shuai Liu, Xiuchao Wang, Dan Xia and Qiang Li

*Beilstein J. Nanotechnol.* **2021**, *12*, 1372–1379. [doi:10.3762/bjnano.12.101](https://doi.org/10.3762/bjnano.12.101)

### **Surface roughness, energy dissipation, point distribution of Young's modulus of AsPC-1, MIA-PaCa-2, BxPC-3, and HDPE6-C7 and point distribution of MIA PaCa-2's Young's modulus treated by DOX in different concentrations**

**Table S1:** Surface roughness of the four cell types.

| Roughness  | HDPE6-C7 | AsPC-1 | MIA-PaCa-2 | BxPC-3 |
|------------|----------|--------|------------|--------|
| $R_a$ (nm) | 645.04   | 102.31 | 708.96     | 77.26  |

**Table S2:** The energy dissipation of different cell types.

| Dissipation | HDPE6-C7 | AsPC-1 | BxPC-3 | MIA-PaCa-2 |
|-------------|----------|--------|--------|------------|
| $W$ (nJ)    | 208.06   | 818.69 | 540.26 | 772.86     |

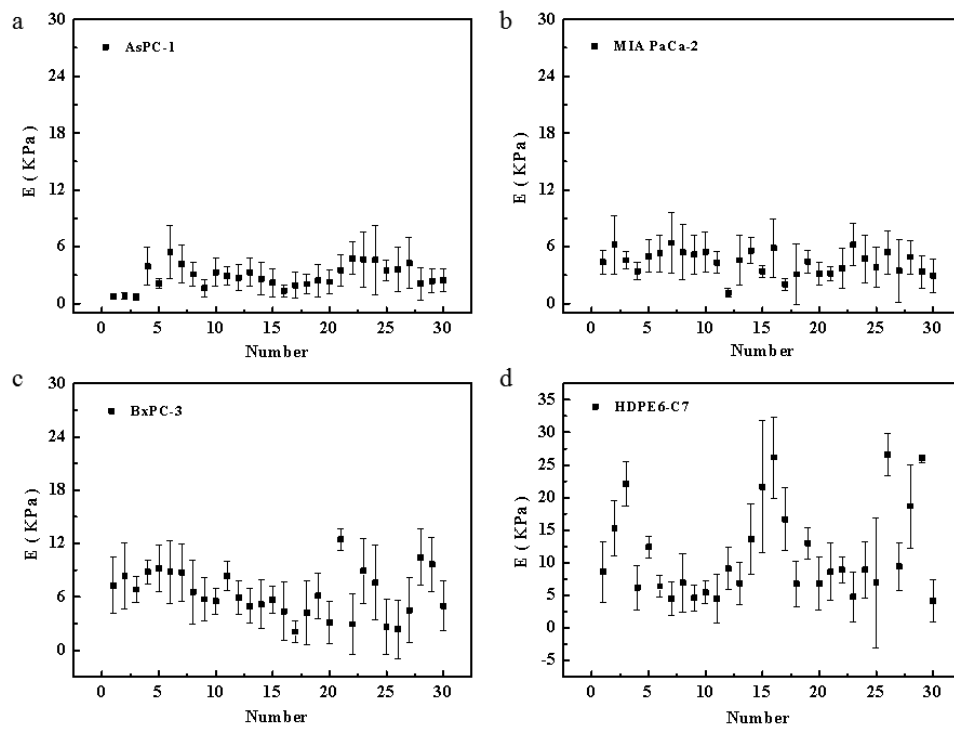

**Figure S1:** The point distribution of Young's modulus of (a) AsPC-1, (b) MIA-PaCa-2, (c) BxPC-3, and (d) HDPE6-C7.

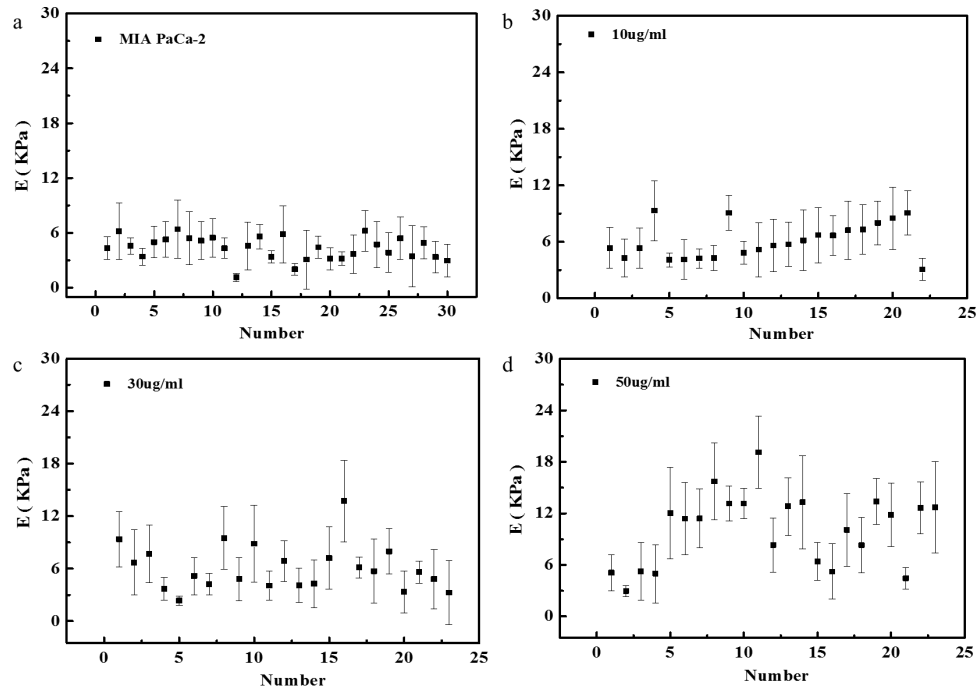

**Figure S2:** Point distribution of the Young's modulus of MIA PaCa-2 cells after treatment with DOX in different concentrations.
